# Supplementary material for: Geographical Variability in Mortality in Urban Areas: A Joint Analysis of 16 Causes of Death
Source: MDPI journal article supplement (doi:10.3390/ijerph18115664), 2021-05-25
Supplement: s1 [file s1]

# Supplementary material to the paper ‘Geographical variability en mortality in large Spanish cities: a multivariate study of 16 causes of death’

---

## R Code used for the statistical analysis of the paper

### 1. Setup

```
knitr::opts_chunk$set(echo = TRUE, message = FALSE, warning=FALSE)

library(flextable)
library(officer)
library(dplyr)

##
## Attaching package: 'dplyr'

## The following objects are masked from 'package:stats':
##
##   filter, lag

## The following objects are masked from 'package:base':
##
##   intersect, setdiff, setequal, union

library(corrplot)

## corrplot 0.84 loaded

library(sf)

## Linking to GEOS 3.8.0, GDAL 3.0.4, PROJ 6.3.1

library(RColorBrewer)

# This is a slightly tuned version of the corrplot::corrplot function
source("corrplot_plotCI.R")

# Cities information
medea3_cities <- readRDS("data/ciudades_medea3.rds")
# Cities abbreviations
medea3_cities$nombre_municipio[c(1, 2, 7, 10, 15, 16, 17, 21, 22)] <-
c("Vitoria", "Alicante", "Castellón", "San Sebastián", "Murcia", "Cartagena",
"Pamplona", "Palmas Gran Canaria", "Santa Cruz Tenerife")

# Smoothed SMRs for each cause of death and city
res_finales_sp <- readRDS("data/res_finales_sp.rds")
```

```

# Correlation matrices derived from the multivariate spatial model
matcor_sp <- readRDS("data/matcor_sp.rds")

# Cartography
carto_medea3_sf <- readRDS("data/carto_medea3_sf.rds")

# Causes of Death
Causes <- list()
Causes$Men <- c("AIDS", "Stomach c.", "Colorectal c.", "Lung c.", "Prostate
c.", "Bladder c.", "Haematological c.", "Diabetes", "Dementia", "IHD",
"Ictus", "COPD", "Cirrhosis", "Suicides", "Traffic Inj.")
Causes$Women <- c("Stomach c.", "Colorectal c.", "Lung c.", "Breast c.",
"Haematological c.", "Diabetes", "Dementia", "IHD", "Ictus", "COPD",
"Cirrhosis")

```

## 2. Standard deviations analysis

```

# log(SMRs) standard deviation for each cause of death and city
desv_log_SMRs <- list()

for(sex in 1:2){
  desv_log_SMRs[[sex]] <- matrix(NA, nrow = nrow(medea3_cities), ncol =
dim(res_finales_sp[[sex]])[2])
  rownames(desv_log_SMRs[[sex]]) <- medea3_cities$nombre_municipio
  colnames(desv_log_SMRs[[sex]]) <- Causes[[sex]]
  for(city in 1:nrow(medea3_cities)){
    codigo <- strsplit(medea3_cities$codigo[city], "-")[[1]]
    desv_log_SMRs[[sex]][city,] <-
apply(res_finales_sp[[sex]][which(substr(rownames(res_finales_sp[[sex]][, "RM
Es"]), 1, 5)%in%codigo), "RMEs"], 2, function(x) sd(log(x)))
  }

  # Cities are ordered alphabetically and cause od according to their
variability
  desv_log_SMRs[[sex]] <-
desv_log_SMRs[[sex]][order(rownames(desv_log_SMRs[[sex]])),]
  desv_log_SMRs[[sex]] <-
desv_log_SMRs[[sex]][,order(apply(desv_log_SMRs[[sex]], 2, mean), decreasing
= TRUE)]
}

names(desv_log_SMRs) <- c("Men", "Women")

```

```

# Men
mean_disease <- apply(desv_log_SMRs$Men, 2, mean)
mean_city <- apply(desv_log_SMRs$Men, 1, mean)

Tabla <- as.data.frame(rbind(cbind(desv_log_SMRs$Men, Mean = mean_city), Mean = c(mean_disease, NA)))
Tabla <- cbind(c(rownames(desv_log_SMRs$Men), "Mean"), Tabla)
colnames(Tabla)[1] <- " "

h_header <- max(dim_pretty(flextable(Tabla), part = "header")$widths)
Tabla <- flextable(Tabla) %>%
  colformat_num(digits = 2) %>%
  vline(j = c('Prostate c.'), border = fp_border(), part = "all") %>%
  hline(i = 26, border = fp_border()) %>%
  rotate(j = 1:dim(Tabla)[2], rotation = "btlr", part = "header") %>%
  height(i = 1, h_header-0.4, part = "header") %>%
  hrule(i = 1, rule = "exact", part = "header") %>%
  width(j = 1: ncol(Tabla), width = c(1.4, rep(0.4, ncol(Tabla)-1))) %>%
  fontsize(size = 8.5, part = "all") %>%
  set_caption(caption = "Variability (standard deviation) of the log(SMRs) for each
disease in men and city.", autonum = run_autonum(pre_label = "Table ", post_label = ". "))

```

Tabla

Table 1. Variability (standard deviation) of the log(SMRs) for each disease in men and city.

|           | AIDS | Cirrhosis | COPD | Lung c. | Diabetes | IHD  | Dementia | Ictus | Stomach c. | Suicides | Traffic Inj. | Bladder c. | Colorectal c. | Haematological c. | Prostate c. | Mean |
|-----------|------|-----------|------|---------|----------|------|----------|-------|------------|----------|--------------|------------|---------------|-------------------|-------------|------|
| Alicante  | 0.52 | 0.29      | 0.25 | 0.14    | 0.15     | 0.12 | 0.10     | 0.12  | 0.13       | 0.26     | 0.10         | 0.15       | 0.02          | 0.06              | 0.03        | 0.16 |
| Almería   | 0.69 | 0.40      | 0.22 | 0.21    | 0.35     | 0.18 | 0.10     | 0.13  | 0.19       | 0.14     | 0.17         | 0.15       | 0.16          | 0.11              | 0.05        | 0.22 |
| Avilés    | 0.20 | 0.30      | 0.27 | 0.14    | 0.17     | 0.10 | 0.21     | 0.15  | 0.11       | 0.14     | 0.07         | 0.20       | 0.06          | 0.15              | 0.22        | 0.16 |
| Barcelona | 0.48 | 0.25      | 0.30 | 0.14    | 0.17     | 0.08 | 0.21     | 0.10  | 0.19       | 0.13     | 0.10         | 0.11       | 0.11          | 0.07              | 0.10        | 0.17 |

|                     | AIDS | Cirrhosis | COPD | Lung c. | Diabetes | IHD  | Dementia | Ictus | Stomach c. | Suicides | Traffic Inj. | Bladder c. | Colorectal c. | Haematological c. | Prostate c. | Mean |
|---------------------|------|-----------|------|---------|----------|------|----------|-------|------------|----------|--------------|------------|---------------|-------------------|-------------|------|
| Bilbao              | 0.65 | 0.26      | 0.31 | 0.18    | 0.17     | 0.12 | 0.15     | 0.11  | 0.17       | 0.18     | 0.04         | 0.08       | 0.10          | 0.08              | 0.09        | 0.18 |
| Cádiz               | 0.52 | 0.25      | 0.22 | 0.19    | 0.10     | 0.17 | 0.08     | 0.13  | 0.07       | 0.04     | 0.20         | 0.04       | 0.09          | 0.17              | 0.09        | 0.16 |
| Cartagena           | 0.46 | 0.29      | 0.25 | 0.20    | 0.13     | 0.18 | 0.17     | 0.20  | 0.12       | 0.11     | 0.09         | 0.19       | 0.14          | 0.14              | 0.11        | 0.19 |
| Castellón           | 0.32 | 0.18      | 0.14 | 0.09    | 0.05     | 0.08 | 0.04     | 0.08  | 0.12       | 0.12     | 0.09         | 0.07       | 0.05          | 0.08              | 0.05        | 0.10 |
| Córdoba             | 0.84 | 0.31      | 0.25 | 0.18    | 0.21     | 0.18 | 0.16     | 0.17  | 0.13       | 0.11     | 0.09         | 0.18       | 0.09          | 0.11              | 0.16        | 0.21 |
| Gijón               | 0.19 | 0.19      | 0.19 | 0.13    | 0.08     | 0.11 | 0.08     | 0.08  | 0.10       | 0.06     | 0.07         | 0.07       | 0.08          | 0.06              | 0.05        | 0.10 |
| Granada             | 0.70 | 0.35      | 0.34 | 0.19    | 0.18     | 0.24 | 0.13     | 0.18  | 0.18       | 0.21     | 0.21         | 0.22       | 0.21          | 0.07              | 0.14        | 0.24 |
| Huelva              | 0.68 | 0.32      | 0.39 | 0.25    | 0.23     | 0.18 | 0.27     | 0.25  | 0.13       | 0.11     | 0.15         | 0.18       | 0.19          | 0.15              | 0.17        | 0.24 |
| Jaén                | 0.34 | 0.26      | 0.21 | 0.12    | 0.06     | 0.15 | 0.06     | 0.19  | 0.13       | 0.20     | 0.07         | 0.08       | 0.07          | 0.12              | 0.09        | 0.14 |
| Madrid              | 0.61 | 0.31      | 0.23 | 0.16    | 0.15     | 0.12 | 0.16     | 0.13  | 0.15       | 0.12     | 0.10         | 0.09       | 0.08          | 0.05              | 0.09        | 0.17 |
| Málaga              | 0.57 | 0.23      | 0.25 | 0.17    | 0.21     | 0.16 | 0.15     | 0.12  | 0.09       | 0.09     | 0.16         | 0.11       | 0.07          | 0.04              | 0.09        | 0.17 |
| Murcia              | 0.37 | 0.29      | 0.25 | 0.18    | 0.12     | 0.10 | 0.16     | 0.15  | 0.12       | 0.08     | 0.15         | 0.06       | 0.05          | 0.05              | 0.12        | 0.15 |
| Oviedo              | 0.35 | 0.20      | 0.20 | 0.17    | 0.13     | 0.11 | 0.09     | 0.15  | 0.17       | 0.11     | 0.05         | 0.17       | 0.11          | 0.07              | 0.03        | 0.14 |
| Palma de Mallorca   | 0.35 | 0.17      | 0.29 | 0.13    | 0.19     | 0.15 | 0.25     | 0.12  | 0.15       | 0.17     | 0.09         | 0.10       | 0.05          | 0.06              | 0.08        | 0.16 |
| Palmas Gran Canaria | 0.40 | 0.34      | 0.32 | 0.21    | 0.20     | 0.18 | 0.06     | 0.18  | 0.24       | 0.18     | 0.24         | 0.14       | 0.07          | 0.09              | 0.07        | 0.20 |
| Pamplona            | 0.37 | 0.16      | 0.22 | 0.14    | 0.15     | 0.18 | 0.23     | 0.11  | 0.08       | 0.04     | 0.07         | 0.12       | 0.06          | 0.14              | 0.06        | 0.14 |
| San Sebastián       | 0.35 | 0.25      | 0.21 | 0.14    | 0.15     | 0.12 | 0.18     | 0.11  | 0.09       | 0.05     | 0.07         | 0.05       | 0.07          | 0.10              | 0.08        | 0.13 |
| Santa Cruz Tenerife | 0.50 | 0.24      | 0.34 | 0.21    | 0.21     | 0.15 | 0.12     | 0.08  | 0.14       | 0.08     | 0.19         | 0.09       | 0.09          | 0.08              | 0.18        | 0.18 |
| Santander           | 0.17 | 0.17      | 0.27 | 0.12    | 0.12     | 0.12 | 0.15     | 0.15  | 0.09       | 0.10     | 0.07         | 0.07       | 0.12          | 0.07              | 0.04        | 0.12 |
| Sevilla             | 0.74 | 0.39      | 0.32 | 0.21    | 0.16     | 0.15 | 0.11     | 0.17  | 0.15       | 0.22     | 0.20         | 0.15       | 0.10          | 0.06              | 0.08        | 0.21 |
| Valencia            | 0.55 | 0.22      | 0.19 | 0.12    | 0.11     | 0.11 | 0.09     | 0.10  | 0.10       | 0.04     | 0.12         | 0.10       | 0.04          | 0.07              | 0.03        | 0.13 |
| Vitoria             | 0.56 | 0.37      | 0.25 | 0.14    | 0.08     | 0.19 | 0.15     | 0.15  | 0.05       | 0.20     | 0.12         | 0.10       | 0.11          | 0.13              | 0.06        | 0.18 |
| Mean                | 0.48 | 0.27      | 0.26 | 0.16    | 0.16     | 0.14 | 0.14     | 0.14  | 0.13       | 0.13     | 0.12         | 0.12       | 0.09          | 0.09              | 0.09        |      |

```

# log(SMRs) standard deviations comparison as a function of cause of death
and city

# Men
sex <- 1
City <- rep(medea3_cities$codigo, dim(desv_log_SMRs[[sex]])[2])
Disease <- rep(colnames(desv_log_SMRs[[sex]]), each =
dim(desv_log_SMRs[[sex]])[1])
Variability <- c(desv_log_SMRs[[sex]])
data_fit <- data.frame(City, Disease, Variability)
fit_anova <- aov(Variability ~ Disease + City, data = data_fit)
print(summary(fit_anova))

# Women
mean_disease <- apply(desv_log_SMRs$Women, 2, mean)
mean_city <- apply(desv_log_SMRs$Women, 1, mean)

Tabla <- as.data.frame(rbind(cbind(desv_log_SMRs$Women, Mean = mean_city),
Mean = c(mean_disease, NA)))
Tabla <- cbind(c(rownames(desv_log_SMRs$Women), "Mean"), Tabla)
colnames(Tabla)[1] <- " "

h_header <- max(dim_pretty(flextable(Tabla), part = "header")$widths)
Tabla <- flextable(Tabla) %>%
  colformat_num(digits = 2) %>%
  vline(j = c('Haematological c.'), border = fp_border(), part = "all") %>%
  hline(i = 26, border = fp_border()) %>%
  rotate(j = 1:dim(Tabla)[2], rotation = "btlr", part = "header") %>%
  height(i = 1, h_header-0.4, part = "header") %>%
  hrule(i = 1, rule = "exact", part = "header") %>%
  width(j = 1: ncol(Tabla), width = c(1.4, rep(0.4,
ncol(Tabla)-1))) %>%
  fontsize(size = 8.5, part = "all") %>%
  set_caption(caption = "Variability (standard deviation)
of the log(SMRs) for each disease in women and city.", autonum =
run_autonum(pre_label = "Table ", post_label = ". "))

```

Tabla

Table 2. Variability (standard deviation) of the log(SMRs) for each disease in women and city.

|          | Diabetes | Dementia | IHD  | COPD | Ictus | Cirrhosis | Stomach c. | Lung c. | Breast c. | Colorectal c. | Haematological c. | Mean |
|----------|----------|----------|------|------|-------|-----------|------------|---------|-----------|---------------|-------------------|------|
| Alicante | 0.16     | 0.21     | 0.13 | 0.13 | 0.10  | 0.19      | 0.04       | 0.06    | 0.07      | 0.04          | 0.05              | 0.11 |
| Almería  | 0.19     | 0.20     | 0.27 | 0.08 | 0.18  | 0.05      | 0.08       | 0.11    | 0.10      | 0.14          | 0.10              | 0.14 |

|                     | Diabetes | Dementia | IHD  | COPD | Ictus | Cirrhosis | Stomach c. | Lung c. | Breast c. | Colorectal c. | Haematological c. | Mean |
|---------------------|----------|----------|------|------|-------|-----------|------------|---------|-----------|---------------|-------------------|------|
| Avilés              | 0.05     | 0.24     | 0.10 | 0.11 | 0.22  | 0.07      | 0.02       | 0.05    | 0.15      | 0.05          | 0.06              | 0.10 |
| Barcelona           | 0.26     | 0.24     | 0.19 | 0.27 | 0.15  | 0.21      | 0.13       | 0.20    | 0.14      | 0.10          | 0.10              | 0.18 |
| Bilbao              | 0.19     | 0.23     | 0.10 | 0.18 | 0.08  | 0.21      | 0.22       | 0.16    | 0.04      | 0.06          | 0.03              | 0.14 |
| Cádiz               | 0.15     | 0.10     | 0.19 | 0.07 | 0.11  | 0.16      | 0.13       | 0.08    | 0.08      | 0.07          | 0.14              | 0.12 |
| Cartagena           | 0.19     | 0.18     | 0.20 | 0.24 | 0.23  | 0.20      | 0.07       | 0.05    | 0.18      | 0.17          | 0.11              | 0.16 |
| Castellón           | 0.07     | 0.15     | 0.10 | 0.06 | 0.09  | 0.05      | 0.04       | 0.10    | 0.02      | 0.07          | 0.04              | 0.07 |
| Córdoba             | 0.17     | 0.20     | 0.21 | 0.18 | 0.17  | 0.12      | 0.20       | 0.09    | 0.10      | 0.09          | 0.12              | 0.15 |
| Gijón               | 0.17     | 0.13     | 0.15 | 0.13 | 0.12  | 0.04      | 0.11       | 0.05    | 0.09      | 0.06          | 0.02              | 0.10 |
| Granada             | 0.29     | 0.14     | 0.20 | 0.16 | 0.21  | 0.26      | 0.20       | 0.07    | 0.09      | 0.11          | 0.09              | 0.17 |
| Huelva              | 0.26     | 0.27     | 0.20 | 0.18 | 0.20  | 0.14      | 0.07       | 0.12    | 0.10      | 0.12          | 0.08              | 0.16 |
| Jaén                | 0.27     | 0.17     | 0.16 | 0.25 | 0.12  | 0.22      | 0.27       | 0.07    | 0.04      | 0.13          | 0.09              | 0.16 |
| Madrid              | 0.21     | 0.24     | 0.15 | 0.22 | 0.13  | 0.12      | 0.11       | 0.20    | 0.08      | 0.08          | 0.05              | 0.14 |
| Málaga              | 0.22     | 0.25     | 0.14 | 0.11 | 0.15  | 0.16      | 0.11       | 0.06    | 0.07      | 0.09          | 0.04              | 0.13 |
| Murcia              | 0.33     | 0.24     | 0.17 | 0.17 | 0.19  | 0.14      | 0.12       | 0.11    | 0.09      | 0.10          | 0.11              | 0.16 |
| Oviedo              | 0.24     | 0.10     | 0.11 | 0.11 | 0.09  | 0.09      | 0.16       | 0.06    | 0.04      | 0.04          | 0.04              | 0.10 |
| Palma de Mallorca   | 0.34     | 0.40     | 0.25 | 0.23 | 0.21  | 0.10      | 0.15       | 0.13    | 0.17      | 0.12          | 0.08              | 0.20 |
| Palmas Gran Canaria | 0.31     | 0.10     | 0.19 | 0.22 | 0.18  | 0.14      | 0.18       | 0.07    | 0.08      | 0.09          | 0.14              | 0.16 |
| Pamplona            | 0.21     | 0.25     | 0.19 | 0.21 | 0.16  | 0.08      | 0.05       | 0.05    | 0.06      | 0.12          | 0.05              | 0.13 |
| San Sebastián       | 0.34     | 0.31     | 0.17 | 0.24 | 0.17  | 0.19      | 0.18       | 0.07    | 0.07      | 0.06          | 0.08              | 0.17 |
| Santa Cruz Tenerife | 0.20     | 0.08     | 0.13 | 0.09 | 0.09  | 0.17      | 0.02       | 0.10    | 0.09      | 0.05          | 0.05              | 0.10 |
| Santander           | 0.19     | 0.22     | 0.17 | 0.17 | 0.19  | 0.09      | 0.05       | 0.05    | 0.10      | 0.08          | 0.02              | 0.12 |
| Sevilla             | 0.27     | 0.20     | 0.22 | 0.20 | 0.22  | 0.31      | 0.17       | 0.12    | 0.12      | 0.10          | 0.08              | 0.18 |
| Valencia            | 0.17     | 0.12     | 0.09 | 0.13 | 0.10  | 0.14      | 0.06       | 0.10    | 0.06      | 0.08          | 0.07              | 0.10 |
| Vitoria             | 0.14     | 0.23     | 0.22 | 0.21 | 0.10  | 0.06      | 0.05       | 0.07    | 0.09      | 0.08          | 0.08              | 0.12 |
| Mean                | 0.21     | 0.20     | 0.17 | 0.17 | 0.15  | 0.14      | 0.11       | 0.09    | 0.09      | 0.09          | 0.07              |      |

*# Log(SMRs) standard deviations comparison as a function of cause of death and city*

*# Women*

```
sex <- 2
City <- rep(medea3_cities$codigo, dim(desv_log_SMRs)[sex])[2])
Disease<- rep(colnames(desv_log_SMRs)[sex]), each =
dim(desv_log_SMRs)[sex])[1])
Variability <- c(desv_log_SMRs[sex])

data_fit <- data.frame(City, Disease, Variability)

fit_anova <- aov(Variability ~ Disease + City, data = data_fit)

print(summary(fit_anova))
```

### 3. Correlation plots

```
array_matcor_sp <- list()

array_matcor_sp$Men <- simplify2array(matcor_sp$hombres)
array_matcor_sp$Women <- simplify2array(matcor_sp$mujeres)

# Correlation matrix between causes of death (mean value for all the cities)
matrix_corr <- list()
matrix_corr$mean <- apply(array_matcor_sp$Men, c(1, 2), mean)
dimnames(matrix_corr$mean)[[1]] <- Causes$Men
dimnames(matrix_corr$mean)[[2]] <- Causes$Men

# Correlation 95% CIs
matrix_corr$lowCI <- apply(array_matcor_sp$Men, c(1, 2), function(x)
  quantile(x, probs = 0.025))
matrix_corr$uppCI <- apply(array_matcor_sp$Men, c(1, 2), function(x)
  quantile(x, probs = 0.975))
# Prob(correlation>0)
matrix_corr$Prob <- apply(array_matcor_sp$Men, c(1, 2), function(x) mean(x >
  0))

corrplot(matrix_corr$mean, type = "upper" , method = "color", order = "FPC",
  tl.pos = "tl", addCoef.col = "black", number.cex = 0.8, tl.col = "black",
  tl.srt = 45, outline = TRUE)
corrplot_plotCI(matrix_corr$mean, add = TRUE, type = "lower", method =
  "circle", order = "FPC",
  diag = FALSE, tl.pos = "n", cl.pos = "n", plotCI = "rect", lowCI.mat
  = matrix_corr$lowCI, uppCI.mat = matrix_corr$uppCI, segments.col = "red",
  segments.lty = 2, segments.lwd = 1)
```

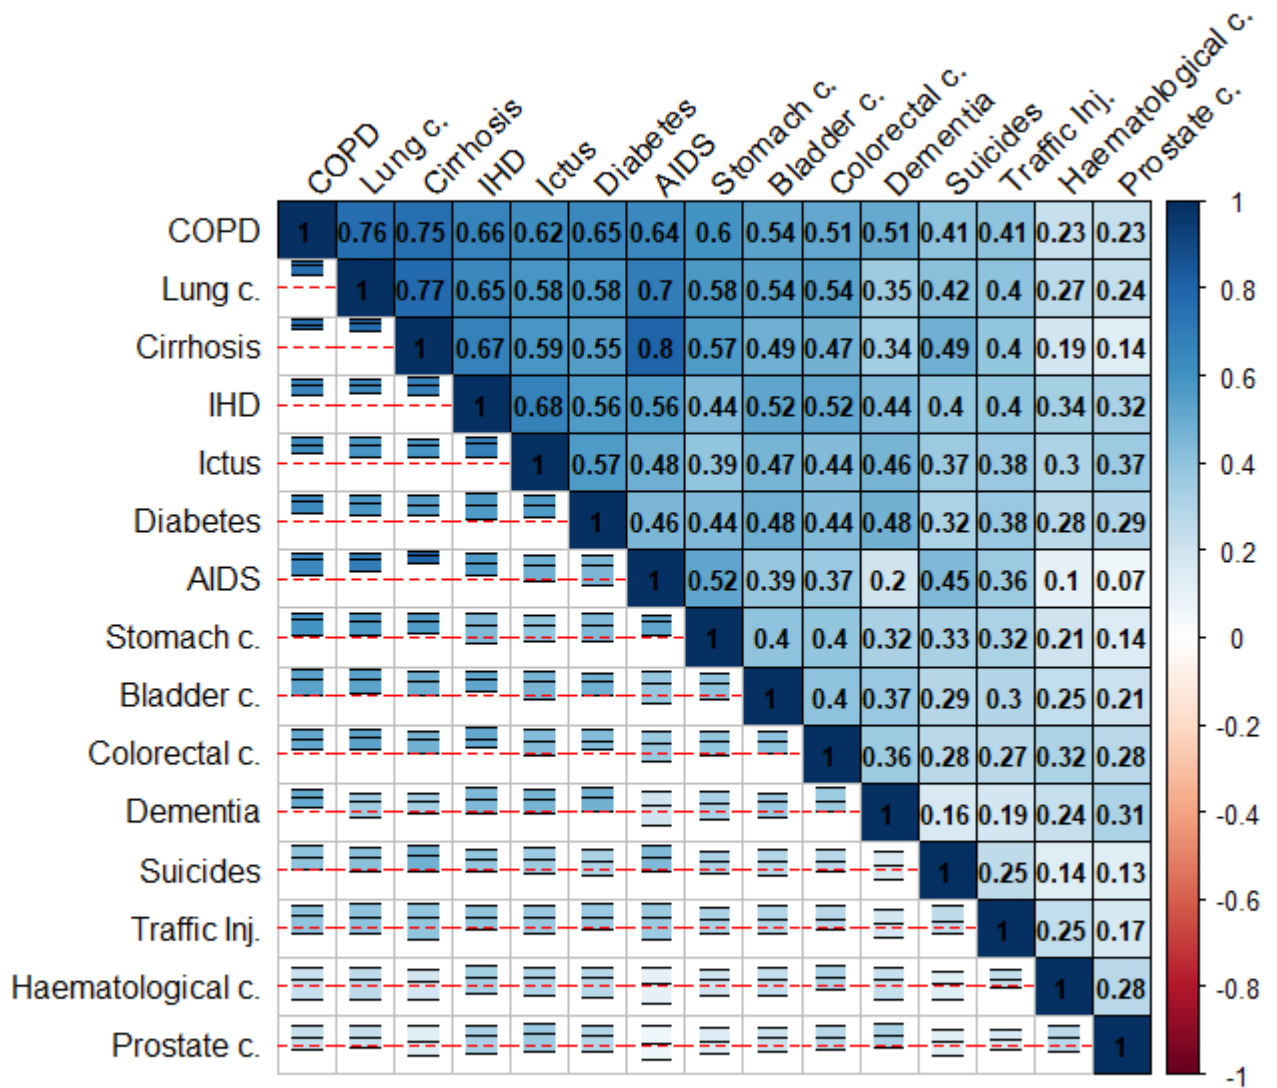

Figure 1: Mean correlation between diseases (upper diagonal) and CI (95%) (lower diagonal) in men.

```
# Women

# Correlation matrix between causes of death (mean value for all the cities)
matrix_corr <- list()
matrix_corr$mean <- apply(array_matcor_sp$Women, c(1, 2), mean)
dimnames(matrix_corr$mean)[[1]] <- Causes$Women
dimnames(matrix_corr$mean)[[2]] <- Causes$Women
```



```

# Correlation 95% CIs
matrix_corr$lowCI <- apply(array_matcor_sp$Women, c(1, 2), function(x)
quantile(x, probs = 0.025))
matrix_corr$uppCI <- apply(array_matcor_sp$Women, c(1, 2), function(x)
quantile(x, probs = 0.975))
# Prob(correlation>0)
matrix_corr$Prob <- apply(array_matcor_sp$Women, c(1, 2), function(x) mean(x
> 0))

corrplot(matrix_corr$mean, type = "upper" , method = "color", order = "FPC",
tl.pos = "tl", addCoef.col = "black", number.cex = 0.8, tl.col = "black",
tl.srt = 45, outline = TRUE)
corrplot_plotCI(matrix_corr$mean, add = TRUE, type = "lower", method =
"circle", order = "FPC",
              diag = FALSE, tl.pos = "n", cl.pos = "n", plotCI = "rect", lowCI.mat
= matrix_corr$lowCI, uppCI.mat = matrix_corr$uppCI, segments.col = "red",
segments.lty = 2, segments.lwd = 1)

```

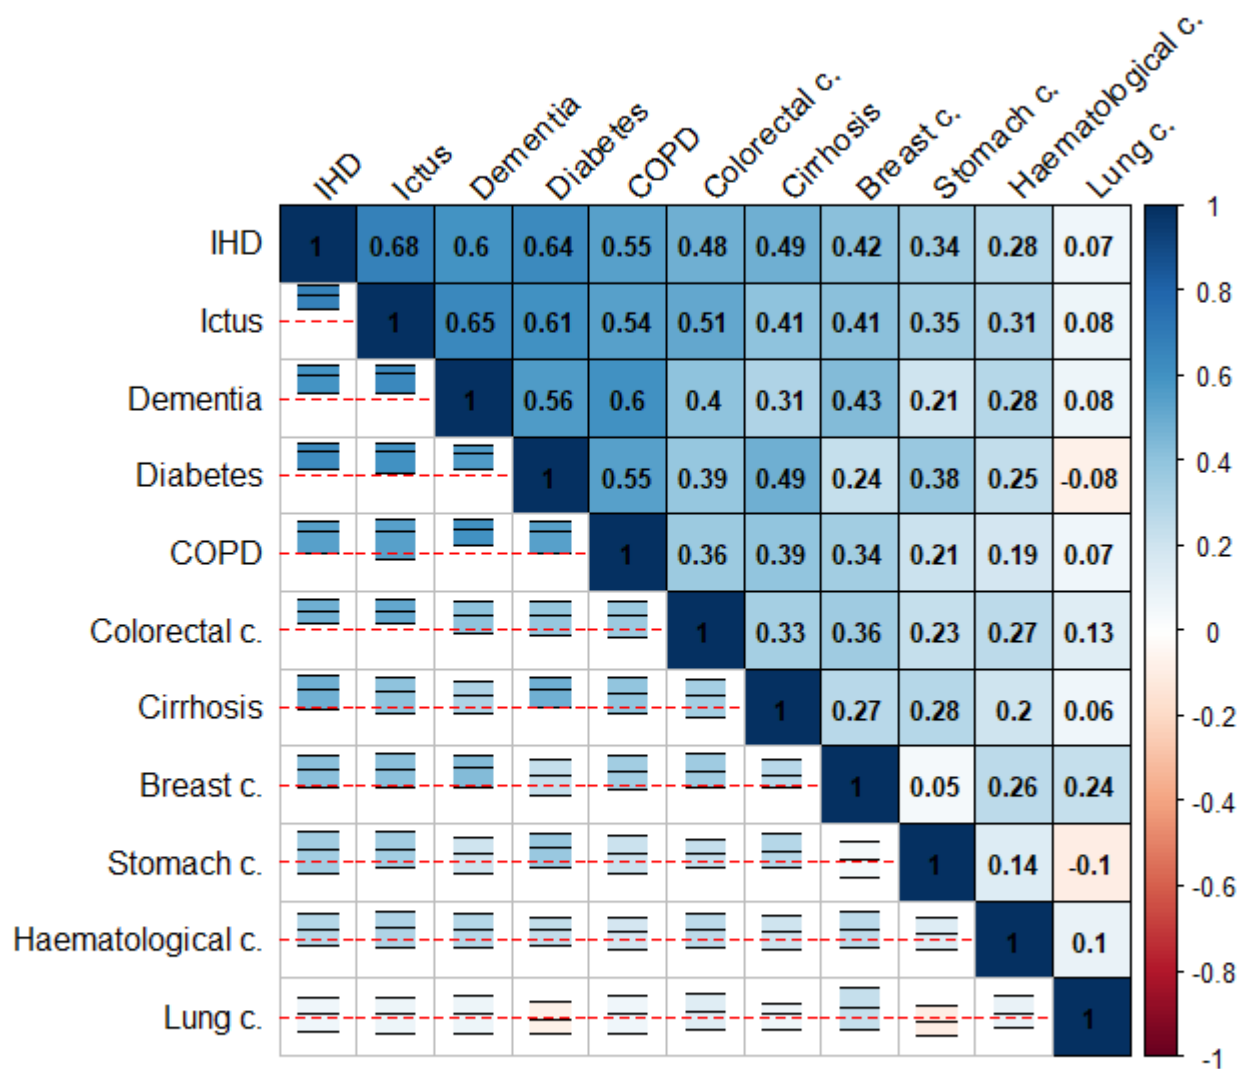

Figure 2: Mean correlation between diseases (upper diagonal) and CI (95%) (lower diagonal) in women.

#### 4. Choropleth maps for Madrid and Barcelona

```
# Causes ID
dimnames(res_finales_sp$hombres)[[2]] <- Causes$Men

# SMRs for COPD, Stomach and Prostate Cancer in men for Madrid and Barcelona
```

```

# Madrid and Barcelona
carto <- list()
carto$Madrid <- st_geometry(carto_medea3_sf[which(carto_medea3_sf$NMUN ==
"Madrid"),])
carto$Barcelona <- st_geometry(carto_medea3_sf[which(carto_medea3_sf$NMUN ==
"Barcelona"),])

# Cut points, palette and graphical parameters
cuts_SMR <- c(0, 0.70, 0.80, 0.90, 1.10, 1.20, 1.30)
palette <- brewer.pal(7, "BrBG")[7:1]
par(oma = c(0, 5, 0, 0), mar = c(0, 0, 1.5, 1), mfrow = c(3, 2))

for(j in c("COPD", "Stomach c.", "Prostate c.")){

  # Madrid

  id_secciones <- which( substr(rownames(res_finales_sp$hombres), 1, 5) %in%
medea3_cities$codigo[which(medea3_cities$nombre_municipio == "Madrid")] )

  aux <- findInterval(res_finales_sp$hombres[id_secciones, j, "RMEs"],
cuts_SMR)
  plot(carto$Madrid, col = palette[aux], xlim = c(-3.808947, -3.558235), ylim
= c(40.402064, 40.463334))

  if(j == "COPD"){ mtext("Madrid", side = 3, cex = 1.2, line = 0.2) }
  mtext(j, side = 2, cex = 1.2, line = 0.4)

  # Barcelona

  id_secciones <- which( substr(rownames(res_finales_sp$hombres), 1, 5) %in%
medea3_cities$codigo[which(medea3_cities$nombre_municipio == "Barcelona")] )

  aux <- findInterval(res_finales_sp$hombres[id_secciones, j, "RMEs"],
cuts_SMR)
  plot(carto$Barcelona, col = palette[aux], xlim = c(2.162453, 2.179207),
ylim = c(41.356925, 41.448253))

  if(j == "COPD"){ mtext("Barcelona", side = 3, cex = 1.2, line = 0.2) }

}

```

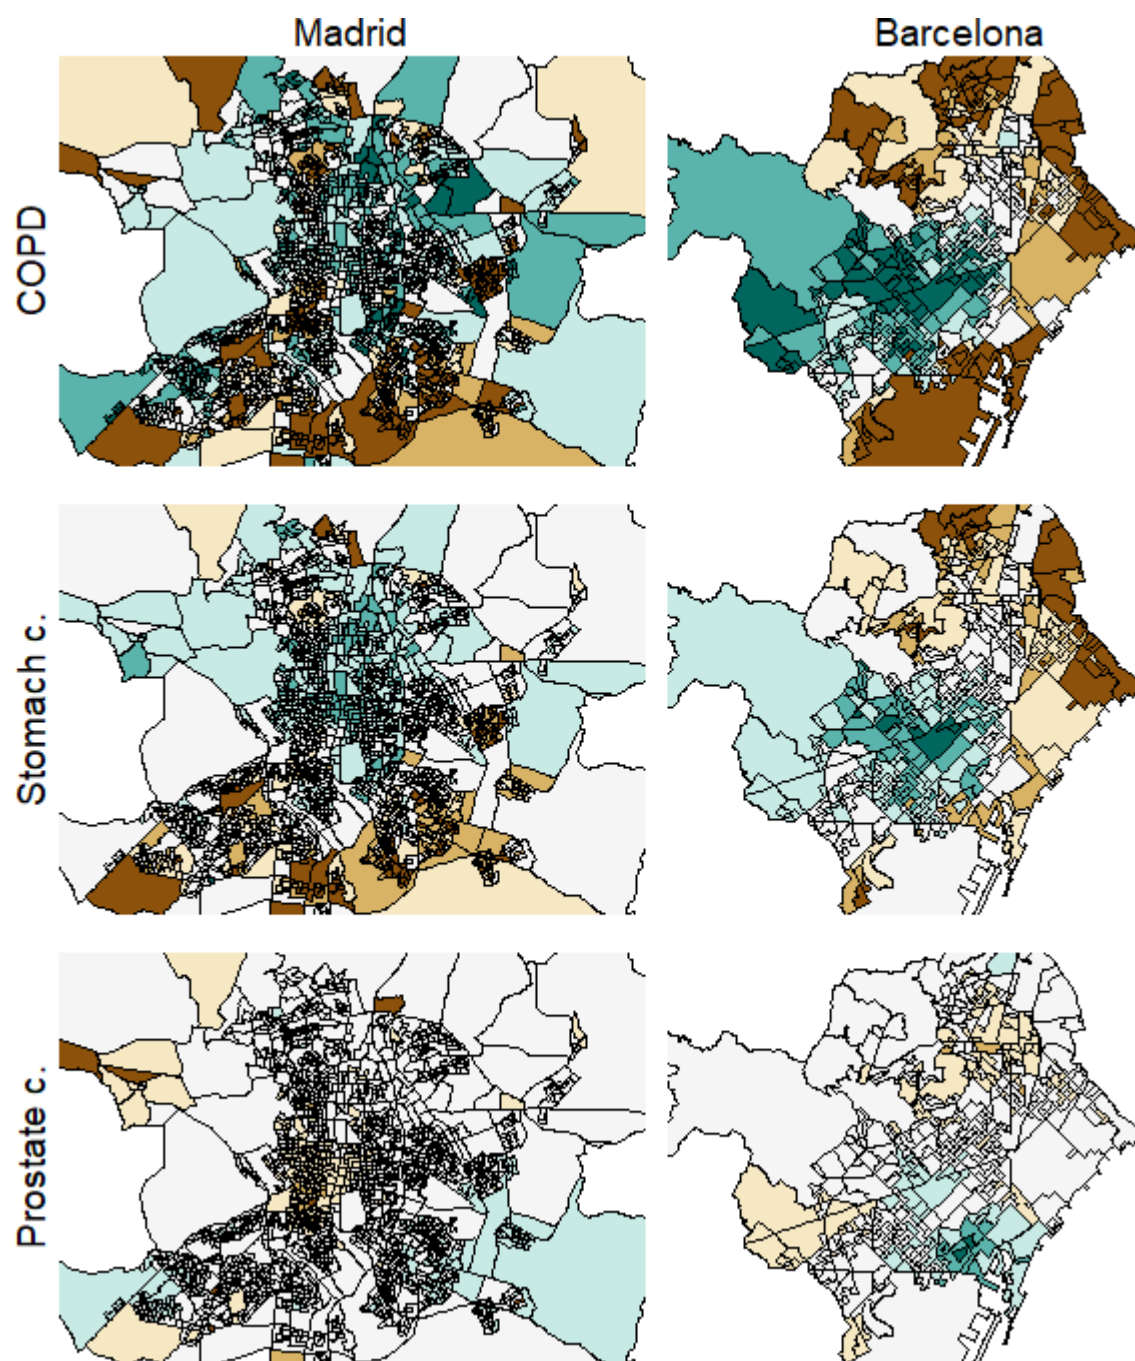

*Figure 3: Choropleth maps for the estimated risk patterns for COPD, stomach cancer and prostate cancer in Madrid (left) and Barcelona (right).*
