# Supplementary material for: Geographical Variability in Mortality in Urban Areas: A Joint Analysis of 16 Causes of Death
Source: MDPI journal article supplement (doi:10.3390/ijerph18115664), 2021-05-25
Supplement: s1 [file s1]

Table S1. Causes of death considered for the MEDEA3 project.

| Cause                                                                 | Short term             | ICD-9 codes      | ICD-10 codes                 | Number of deaths,<br>men | Number of deaths,<br>women |
|-----------------------------------------------------------------------|------------------------|------------------|------------------------------|--------------------------|----------------------------|
| AIDS                                                                  | AIDS                   | 279(.5.6)        | B20-B24                      | 9,466                    | 2,381                      |
| Malignant neoplasm of stomach                                         | Gastric cancer         | 151              | C16                          | 16,962                   | 11,602                     |
| Malignant colorectal neoplasm                                         | Colorectal cancer      | 153-154          | C18-C21                      | 41,407                   | 32,826                     |
| Malignant neoplasm of trachea, bronchus and lung                      | Lung cancer            | 162              | C33-C34                      | 89,881                   | 18,421                     |
| Malignant neoplasm of breast                                          | Brest cancer           | 174              | C50                          | 235                      | 35,393                     |
| Malignant neoplasm of prostate                                        | Prostate cancer        | 185              | C61                          | 27,574                   | 0                          |
| Malignant neoplasm of bladder                                         | Bladder cancer         | 188              | C67                          | 19,775                   | 4,893                      |
| Hematologic malignant neoplasm                                        | Hematologic cancer     | 200-208, 273.3   | C81-C96                      | 21,469                   | 20,245                     |
| Diabetes Mellitus                                                     | Diabetes mellitus      | 250              | E10-E14                      | 18,544                   | 26,421                     |
| Organic senile and presenile mental disorders and Alzheimer's disease | Dementia               | 290, 331.0       | F00-F09, G30                 | 32,464                   | 77,480                     |
| Ischemic heart diseases                                               | Ischemic heart disease | 410-414          | I20-I25                      | 108,892                  | 88,797                     |
| Cerebrovascular diseases                                              | Ictus                  | 430-434, 436-438 | I60-I69                      | 65,047                   | 98,221                     |
| Chronic obstructive pulmonary diseases                                | COPD                   | 490-492, 494-496 | J40-J44, J47                 | 55,681                   | 18,391                     |
| Cirrhosis and chronic liver diseases                                  | Liver cirrhosis        | 571              | K70, K72.1, K73-K74, K76.1.9 | 22,277                   | 11,026                     |
| Suicide and intentional self-harm                                     | Suicide                | E950-E959        | X60-X84                      | 10,418                   | 4,320                      |
| Motor vehicle accident injuries                                       | Traffic accident       | E810-E819        | ‡                            | 9,998                    | 3,472                      |

‡ ICD10 codes: V02-V04(.1.9), V09(.2.3), V12-V14(.3.4.5.9), V19(.4.5.6.9), V20-V28(.3.4.5.9), V29(.4.5.6.9), V20-V28(.3.4.5.7.9), V29(.4.5.6.9), V30-V38(.3.4.5.7.9), V39(.4.5.6.9), V40-V48(.3.4.5.7.9), V49(.4.5.6.9), V50-V58(.3.4.5.7.9), V59(.4.5.6.9), V60-V68(.3.4.5.7.9), V69(.4.5.6.9), V70-V78(.3.4.5.7.9), V79(.4.5.6.9), V80(.3.4.5), V81-V82(.1), V83-V86(.0.1.2.3), V87(.0.1.2.3.4.5.6.7.8), V89(.2.9).
